# Supplementary material
Source: MDPI journal article supplement (https://www.mdpi.com/2073-4441/13/17/2445)
Supplement: s1 [file s1]

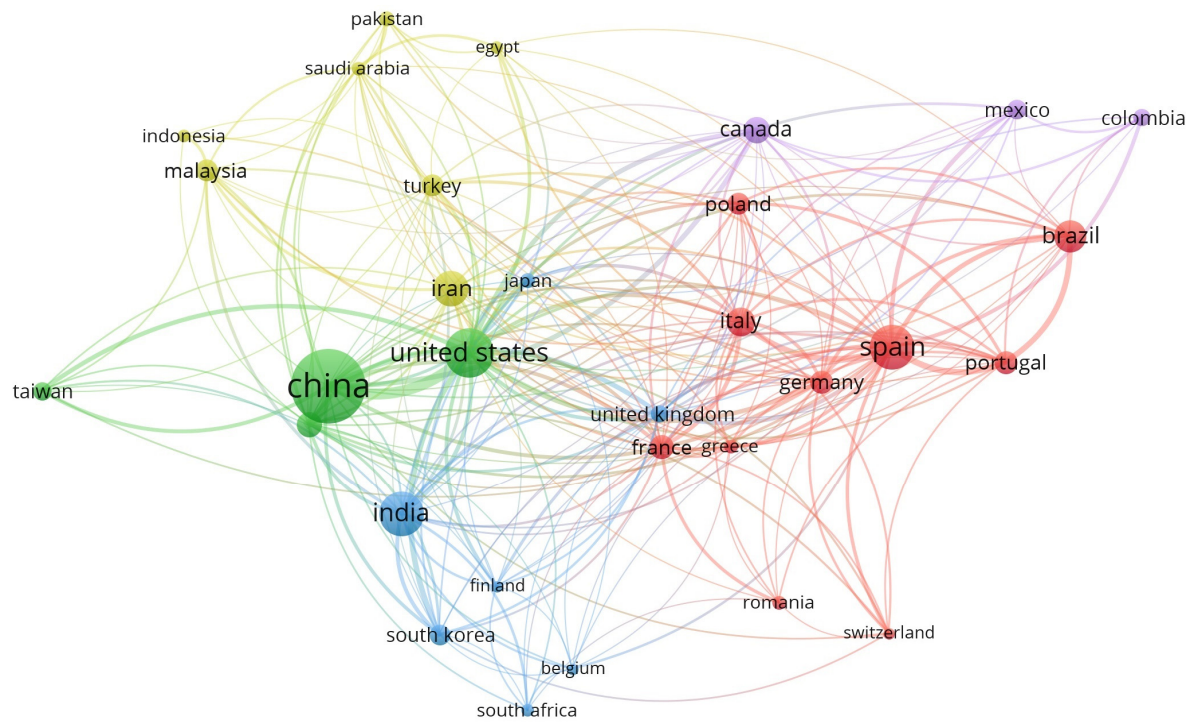

**Figure S1.** Bibliometric map of global collaboration network among countries during 2010–2020.  
Source: VOSviewer® software.
